# Supplementary material
Source: PubMed Central journal article supplement (PMC3838135)
Supplement: JVI.02126-13_zjv999098313so1.pdf [file JVI.02126-13_zjv999098313so1.pdf]

A

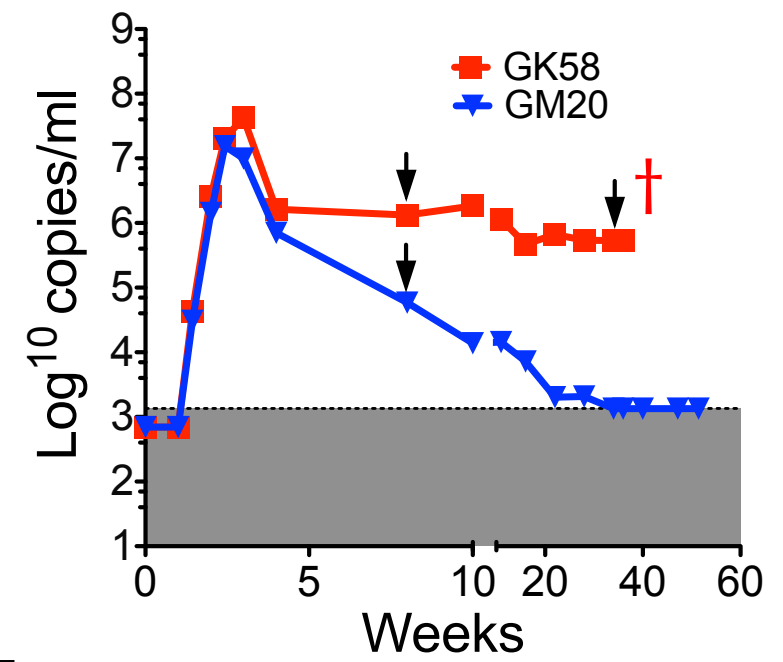

B

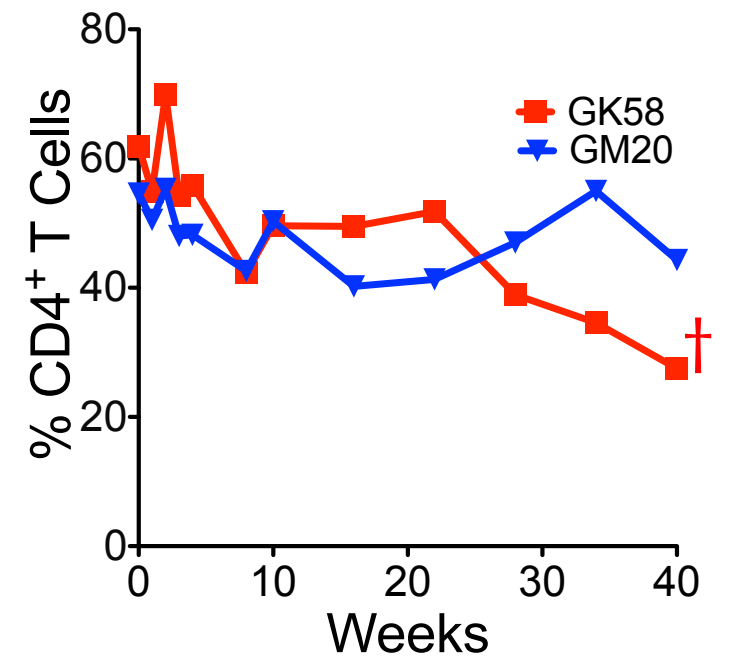

C

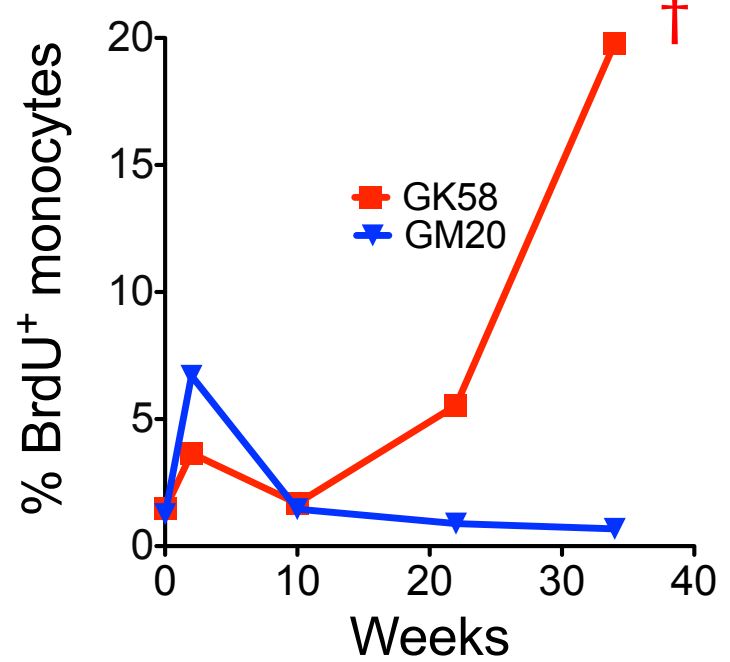

D

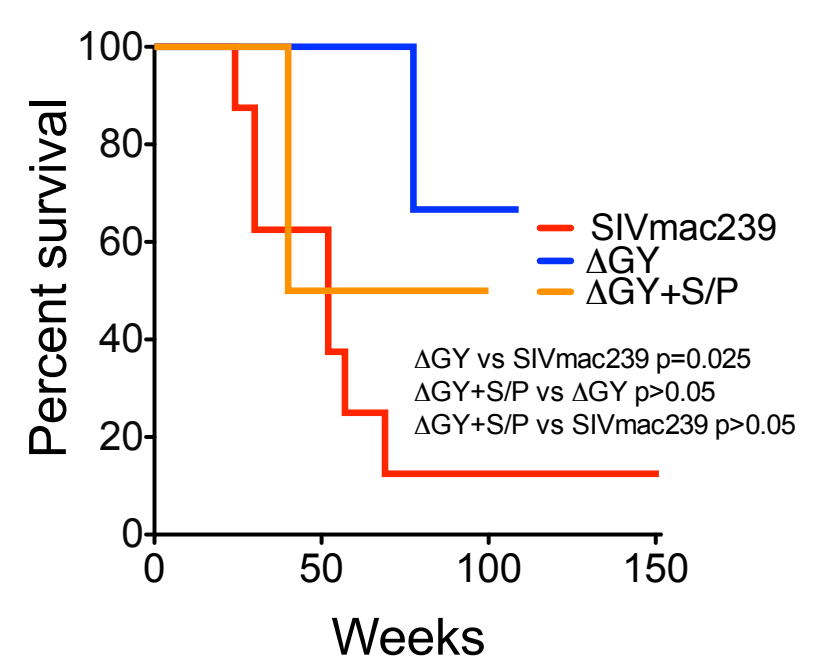

E

| SIVMAC239        | VILLRIVIIYI | VQMLAKLRQG | YRPVFS | SPPS       | YFQOTHIQD | PALPTREGKE | RDGEGEGGNS | SWPWQIEYIH | FLIRQLIRLL | TWLFNSNCRTL | LSRVYQILQP | ILQRLSATLQ | RIREVLRTTEL | TYLQYGWSYF | HEAVQAVWRS | ATETLAGAWG | DLWETLRRGG | RWILAIPRRI | RQGLELTLL* |        |
|------------------|-------------|------------|--------|------------|-----------|------------|------------|------------|------------|-------------|------------|------------|-------------|------------|------------|------------|------------|------------|------------|--------|
| GM20.WK8..P1A1   | -----       | -----      | -----  | -----P     | -----     | -----      | G-----     | -----      | -----      | -----       | -----      | -----      | -----       | -----      | -----      | -----      | -----      | -----      | -----      | -----  |
| GM20.WK8..P1C8   | -----       | -----      | -----  | -----P     | -----     | -----      | G-----     | -----      | -----      | -----       | -----      | -----      | -----       | -----      | -----      | -----      | -----      | -----      | -----      | -----  |
| GM20.WK8..P3A10  | -----       | -----      | -----  | -----P     | -----     | -----      | G-----     | -----      | -----      | -----       | -----      | -----      | -----       | -----      | -----      | -----      | -----      | -----      | -----      | -----  |
| GM20.WK8..P3A12  | -----       | -----      | -----  | -----P     | -----     | -----      | G-----     | -----      | -----      | -----       | -----      | -----      | -----       | -----      | -----      | -----      | -----      | -----      | -----      | -----  |
| GM20.WK8..P3A4   | -----       | -----      | -----  | -----P     | -----     | -----      | G-----     | -----      | -----      | -----       | -----      | -----      | -----       | -----      | -----      | -----      | -----      | -----      | -----      | -----  |
| GM20.WK8..P3A7   | -----       | -----      | -----  | -----P     | -----     | -----      | G-----     | -----      | -----      | -----       | -----      | -----      | -----       | -----      | -----      | -----      | -----      | -----      | -----      | -----  |
| GM20.WK8..P3A8   | ---V-----   | -----      | -----  | -----P     | -----     | -----      | G-----     | -----      | -----      | -----       | -----      | -----      | -----       | -----      | -----      | -----      | -----      | -----      | -----      | -----  |
| GM20.WK8..P3B12  | -----       | -----      | -----  | -----P     | -----     | -----      | G-----     | -----      | -----      | -----       | -----      | -----      | -----       | -----      | -----      | -----      | -----      | -----      | -----      | -----  |
| GM20.WK8..P3C4   | -----       | -----      | -----  | -----P     | -----     | -----      | G-----     | -----      | -----      | -----       | -----      | -----      | -----       | -----      | -----      | -----      | -----      | -----      | -----      | -----  |
| GM20.WK8..P3C6DP | -----       | -----      | -----  | -----P     | -----     | -----      | G-----     | -----      | -----      | -----       | -----      | -----      | -----       | -----      | -----      | -----      | -----      | -----      | -----      | -----  |
| GM20.WK8.P1C12   | -----       | -----      | -----  | -----P     | -----     | -----      | G-----     | -----      | -----      | -----       | -----      | -----      | -----       | -----      | -----      | -----      | -----      | -----      | -----      | -----  |
| GM20.WK8..P3A6   | -----       | -----      | -----  | -----P     | -----     | -----      | G-----     | -----      | -----      | -----       | -----      | -----      | -----       | -----      | -----      | -----      | -----      | -----      | -----      | -----  |
| GK58.WK8.P3E12   | -----       | -----      | -----  | -----P     | -----     | -----      | G-----     | -----      | -----      | -----       | -----      | -----      | -----       | -----      | -----      | -----      | -----      | -----      | -----      | -----  |
| GK58.WK8.P3F1    | -----       | -----      | -----  | -----P     | -----     | -----      | G-----     | -----      | -----      | -----       | -----      | -----      | -----       | -----      | -----      | -----      | -----      | -----      | -----      | -----  |
| GK58.WK8.P3F10   | -----       | -----      | -----  | -----P     | -----     | -----      | G-----     | -----      | -----      | -----       | -----      | -----      | -----       | -----      | -----      | -----      | -----      | -----      | -----      | -----  |
| GK58.WK8.P3F3    | -----       | -----      | -----  | -----P     | -----     | -----      | G-----     | -----      | -----      | -----       | -----      | -----      | -----       | -----      | -----      | -----      | -----      | -----      | -----      | -----  |
| GK58.WK8.P3F9    | -----       | -----      | -----  | -----P     | -----     | -----      | G-----     | -----      | -----      | -----       | -----      | -----      | -----       | -----      | -----      | -----      | -----      | -----      | -----      | -----  |
| GK58.WK8.P3G7    | -----       | -----      | -----  | -----P     | -----     | -----      | G-----     | -----      | -----      | -----       | -----      | -----      | -----       | -----      | -----      | -----      | -----      | -----      | -----      | -----  |
| GK58.WK8.P3H1    | -----       | -----      | -----  | -----P     | -----     | -----      | G-----     | -----      | -----      | -----       | -----      | -----      | -----       | -----      | -----      | -----      | -----      | -----      | -----      | -----  |
| GK58.WK8.P3H4    | -----       | -----      | -----  | -----P     | -----     | -----      | G-----     | -----      | -----      | -----       | -----      | -----      | -----       | -----      | -----      | -----      | -----      | -----      | -----      | -----  |
| GK58.WK34.P5G6   | -----       | -----      | -----  | -----P     | -----     | -----      | G-----     | -----      | -----      | -----I      | -----      | -----      | -----       | -----      | -----F     | -----      | -----      | -----      | -----      | -----  |
| GK58.WK34.P5C2   | -----       | -----      | -----  | -----P     | -----     | -----      | G-----     | -----      | -----      | -----       | -----L     | -----      | -----       | -----      | -----A     | -----      | -----      | -----      | -----      | -----Y |
| GK58.WK34.P5D10  | -----       | -----      | -----  | -----S-P   | -----     | -----      | G-----     | -----      | -----      | -----       | -----L     | -----F     | -----       | -----      | -----F     | -----      | -----      | -----      | -----      | -----Y |
| GK58.WK34.P5D2   | -----       | -----      | -----  | -----P     | -----     | -----      | G-----     | -----      | -----      | -----       | -----L     | -----F     | -----       | -----      | -----G     | -----      | -----      | -----      | -----      | -----Y |
| GK58.WK34.P5D6   | -----       | -----      | -----  | -----P     | -----     | -----      | G-----     | -----      | -----      | -----       | -----I     | -----L     | -----F      | -----      | -----F     | -----      | -----      | -----      | -----      | -----Y |
| GK58.WK34.P5E10  | -----       | -----      | -----  | -----S-L-P | -----     | -----      | G-----     | -----      | -----      | -----       | -----L     | -----      | -----       | -----      | -----A     | -----      | -----      | -----      | -----      | -----Y |
| GK58.WK34.P5F5   | -----       | -----      | -----  | -----P     | -----     | -----      | G-----     | -----      | -----      | -----       | -----S     | -----F     | -----       | -----      | -----I-F   | -----      | -----      | -----      | -----      | -----Y |
| GK58.WK34.P5G1   | -----       | -----      | -----  | -----E-P   | -----     | -----      | G-----     | -----      | -----      | -----       | -----L     | -----      | -----       | -----      | -----F     | -----      | -----R     | -----      | -----      | -----  |
| GK58.WK34.P5G3   | -----       | -----      | -----  | -----S-L-P | -----     | -----      | G-----     | -----      | -----      | -----       | -----L     | -----F     | -----       | -----      | -----A     | -----      | -----      | -----      | -----      | -----Y |

**Supplemental Figure 1.** Viral load, CD4<sup>+</sup>T cell dynamics, monocyte turnover, survival analysis and evolution of  $\Delta$ GY+S/P during chronic infection. Plasma viral RNA (A), peripheral CD4<sup>+</sup> T-cell percentages (B), and percent monocyte turnover as an indicator of immune activation (3) (C) are shown for two  $\Delta$ GY+S/P animals followed through chronic infection. Shaded area in Panel A indicates the limits of sensitivity of the viral RNA assay, and “†” indicates euthanasia due to AIDS. Kaplan Meyer survival plots are shown for rhesus macaques infected with SIVmac239 (red),  $\Delta$ GY (blue) and  $\Delta$ GY+S/P (orange) (D). No statistical difference was observed between the  $\Delta$ GY+S/P group and the SIVmac239 group or  $\Delta$ GY group; however the  $\Delta$ GY group showed greater survival compared to SIVmac239 ( $p=0.025$ ) (2). (E) Single genome amplification of plasma viral RNA was performed at the time points indicated by the arrows in panel A for  $\Delta$ GY+S/P-infected animals. Amino acid sequences of amplicons for GK58 (weeks 8 and 34) and GM20 (week 8) are shown. Amplicons are grouped by sampling time with each clone designated by the animal name, the week of sampling, and a unique identifier. Amino acid sequences are shown relative to SIVmac239 with “-” indicating identity, “.” indicating a space introduced for alignment, and “\*” indicating the naturally occurring *env* stop codon. The positions of the  $\Delta$ GY deletion mutation at amino acid positions 721-722 (blue bolded text) and the S/P point mutation at position 727 (orange bolded text) are indicated. All *env* clones maintained the  $\Delta$ GY and S727P mutations. They also acquired an R751G mutation, as is typically seen during replication of SIVmac239 *in vivo* (1). Additional changes were acquired in GM58 at week 34 during its progression to AIDS including (in 7 of 9 amplicons) a L876Y at the C-terminus, which created a new YxxØ motif (YTLL).

1. **Alexander, L., P. O. Illyinskii, S. M. Lang, R. E. Means, J. Lifson, K. Mansfield, and R. C. Desrosiers.** 2003. Determinants of increased replicative capacity of serially passaged simian immunodeficiency virus with nef deleted in rhesus monkeys. *J Virol* **77**:6823-6835.
2. **Breed, M. W., A. P. Jordan, P. P. Aye, C. F. Lichtveld, C. C. Midkiff, F. R. Schiro, B. S. Haggarty, C. Sugimoto, X. Alvarez, N. G. Sandler, D. C. Douek, M. J. Kuroda, B. Pahar, M. Piatak, Jr., J. D. Lifson, B. F. Keele, J. A. Hoxie, and A. A. Lackner.** 2013. Loss of a tyrosine-dependent trafficking motif in the simian immunodeficiency virus envelope cytoplasmic tail spares mucosal CD4 cells but does not prevent disease progression. *J Virol* **87**:1528-1543.
3. **Hasegawa, A., H. Liu, B. Ling, J. T. Borda, X. Alvarez, C. Sugimoto, H. Vinet-Oliphant, W. K. Kim, K. C. Williams, R. M. Ribeiro, A. A. Lackner, R. S. Veazey, and M. J. Kuroda.** 2009. The level of monocyte turnover predicts disease progression in the macaque model of AIDS. *Blood* **114**:2917-2925.
